# Supplementary material for: Dephosphorylation of the Proneural Transcription Factor ASCL1 Re-Engages a Latent Post-Mitotic Differentiation Program in Neuroblastoma
Source: Oxford University Press journal article supplement (doi:10.1158/1541-7786.mcr-20-0693), 2020-10-12
Supplement: 15417786mcr200693-sup-249014_2_supp_6613346_qhqj4f.xlsx [file 15417786mcr200693-sup-249014_2_supp_6613346_qhqj4f.xlsx]

## Sheet: Sheet1
List of primers used in gene expression qPCR experiments
Gene	Primer forward (5’-3’)	Primer reverse (5’-3’)
NTRK1	TTGCCTGCCTCTTCCTTTCTAC	ATTGTGGGTTCTCGATGATGTG
DBN1	GAGGAAACTGAGGCAAAGAGGA	TCGGAGCCATCTTCATATGTGT
ADRA2C	GAGTACAACCTGAAGCGCACAC	GGAGGACAGGATGTACCAGGTC
NKD1	AAGAGGAGCGTCCTTGTCAATC	CCGGCGAGATCTAAGTAGTGGT
CDKN1C	GAGCCAATTTAGAGCCCAAAGA	AAGCTTTACACCTTGGGACCAG
RET	TAGCTCCTGGGAGAAGCTCAGT	GGAAAGGAGGTGTTGAAGAAGG
TUBB3	TCAGCAAGGTGCGTGAGGAG	GAGGGTGCGGAAGCAGATGT
MAP2	TTCTGCGCCCAGATTTTATTGA	GCTCCCAATCAATGCTTCCT
DBH	TCAACAACGAGGATGTCTGC	CAGTGTGGAGATGACCTTGG
CDK1	GGCCTTGCCAGAGCTTTTGGAATA	AGTGGTTTCTTAGTTGCTAGTTCAGC
CDK2	TACCGAGCTCCTGAAATCCTCCT	CGGAAGAGCTGGTCAATCTCAGAAT
SKP2	CCACGGAAACGGCTGAAGAGCA	CAAACACCAGAGACCTTTAGCAGCT
E2F1	TGACATCACCAACGTCCTTGAGG	CTGTCGGAGGTCCTGGGTCAA
FOXM1	GTGAATCTTCCTAGACCACCTGGA	GTGACAATTCTCCTTTTCCTCCATCT
BIRC5	CATTCGTCCGGTTGCGCTTTCC	CGGCGCACTTTCTCCGCAGTTT
CDCA7	ACGAACTGGCCGGTATTTTTCATGC	GGTACTCCGCGCTGGAAACTTC
KI67	GAGGTGTGCAGAAAATCCAAA	CTGTCCCTATGACTTCTGGTTGT
PHOX2B	TTCACCAGTGCCCAGCTCAAAGA	TTGCCCGAGGAGCCGTTCTTG
GATA3	CCAGCACAGAAGGCAGGGAGT	CTGTCCGTTCATTTTGTGATAGAGCC
HAND2	ATACGAAGAGGACACTCCCG	GGACCTGATGACTTTCTCCC
TBP	GAGCTGTGATGTGAAGTTTCC	TCTGGGTTTGATCATTCTGTAG
List of primers used in Chip-qPCR experiments
Gene	Primer forward (5’-3’)	Primer reverse (5’-3’)
SKP2	TGGCCCTTGGAGTGAGTGTATG	ATTGTCCCCTTTCCGCCTGTTA
E2F1	GCCTTCACTTCCCCTAGCAGCT	GTGGTGGGGCTGGGATTTGAAC
CDCA7	GGTCTTGCGAACCGGTCTCCTA	AAATGCACTTAACCACCGCCCG
NTRK1	GATGACCTGGACAGCAACCTTT	GCATTTTTACATTTGGGGAGGA
DBN1	GAGAAGCAGAGGGAGAAACCAG	TGTCCCTTCACTTCTGTCCTTTC
ADRA2C	CACATGTGCTAATGCTCACACC	TGTATCTCCCCACCTGTGTCTG
NKD1	CTTAACAGAGAGGAGGCCCTGA	CAGAGACGTCCAAATGACTTGC
CDKN1C	AGCTTTACACCTTGGGACCAGT	GACCGTTCATGTAGCAGCAACC
RET	CTGATTCCAAAATGAGCACAGG	CCCCAAGTGCTAGGATTACAGG
DBH	CCGCCTGTCTACTTCAACTCC	TGTACATGAAGGCTGCCTCC
PHOX2B	CTTGCTAATGTCTCTGCCTGCG	AGACGCATAGAAACACCCACCA
GATA3	GCAGGGTAAGATGTCCAAAGCC	GGTGAGTGGAAAGGAATTGGAGTC
HAND2	ACTGGAGTTGGAATGAGGCATCT	CTAAGGCTTTCGTGGGGCAATG
